# Supplementary material
Source: PubMed Central journal article supplement (PMC6748645)
Supplement: NIHMS1050376-supplement-Supporting_Information.pdf [file NIHMS1050376-supplement-Supporting_Information.pdf]

## Supporting Information

### Profiling of polar metabolites in mouse feces using four analytical platforms to study the effects of cathelicidin-related antimicrobial peptide in alcoholic liver disease

Liqing He<sup>1,2,3,4</sup>, Fengyuan Li<sup>3,4,5</sup>, Xinmin Yin<sup>1,2,3,4</sup>, Patrick Bohman<sup>8</sup>, Seongho Kim<sup>9</sup>, Craig J. McClain<sup>2,3,5,6,7</sup>, Wenke Feng<sup>2,3,4,5,6\*</sup>, Xiang Zhang<sup>1,2,3,4,5\*</sup>

<sup>1</sup>Department of Chemistry, <sup>2</sup>University of Louisville Alcohol Research Center, <sup>3</sup>University of Louisville Hepatobiology & Toxicology Center, <sup>4</sup>Center for Regulatory and Environmental Analytical Metabolomics, <sup>5</sup> Department of Pharmacology & Toxicology, <sup>6</sup>Department of Medicine, University of Louisville, Louisville, KY 40208, USA. <sup>7</sup>Robley Rex Louisville VAMC, Louisville, KY 40292, USA

<sup>8</sup>Thermo Fisher Scientific International Inc., 3000 lakeside Dr., Bannockburn, IL 60015, USA

<sup>9</sup>Biostatistics Core, Karmanos Cancer Institute, Wayne State University, Detroit, MI 48201

#### CORRESPONDING AUTHOR:

Dr. Xiang Zhang, Department of Chemistry, University of Louisville, 2210 South Brook Street, Louisville, KY 40208, USA. Phone: +01 502 852 8878. Fax: +01 502 852 8149. E-mail: xiang.zhang@louisville.edu.

Dr. Wenke Feng, Department of Medicine, University of Louisville, 505 S. Hancock Street CTR517,

Louisville, KY 40202, USA. Tel.: +1 502 852 2912; Fax: +1 502 852 8927. E-mail: wenke.feng@louisville.edu.

#### Table of Contents:

| Page # | Name      | Caption                                                                                       |
|--------|-----------|-----------------------------------------------------------------------------------------------|
| S-2    | Fig. S-1  | The results of individual PLS-DA analysis                                                     |
|        | Fig. S-2  | The results of PCA analysis                                                                   |
| S-3    | Table S-1 | Metabolites changed in feces by alcohol detected by three platforms                           |
| S-7    | Table S-2 | Metabolites changed in feces by CRAMP knockout detected by three platforms                    |
| S-11   | Table S-3 | Metabolites changed in feces by CRAMP knockout exposed to alcohol detected by three platforms |

## Supporting Information

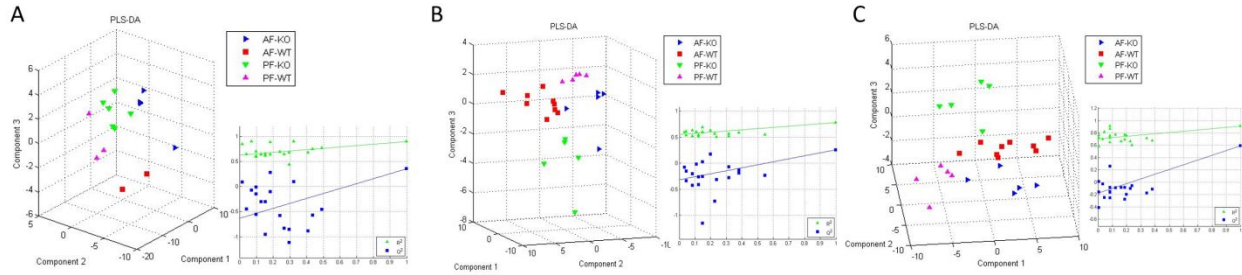

**Figure S-1.** The results of PLS-DA. (A) is the result of PLS-DA using GC×GC-MS data ( $R^2=0.89$ ,  $Q^2=0.35$ ). (B) is the result of PLS-DA using 2DLC-MS/MS(-) data ( $R^2=0.78$ ,  $Q^2=0.26$ ). (C) is the result of PLS-DA using 2DLC-MS/MS(+) data ( $R^2=0.91$ ,  $Q^2=0.59$ ).

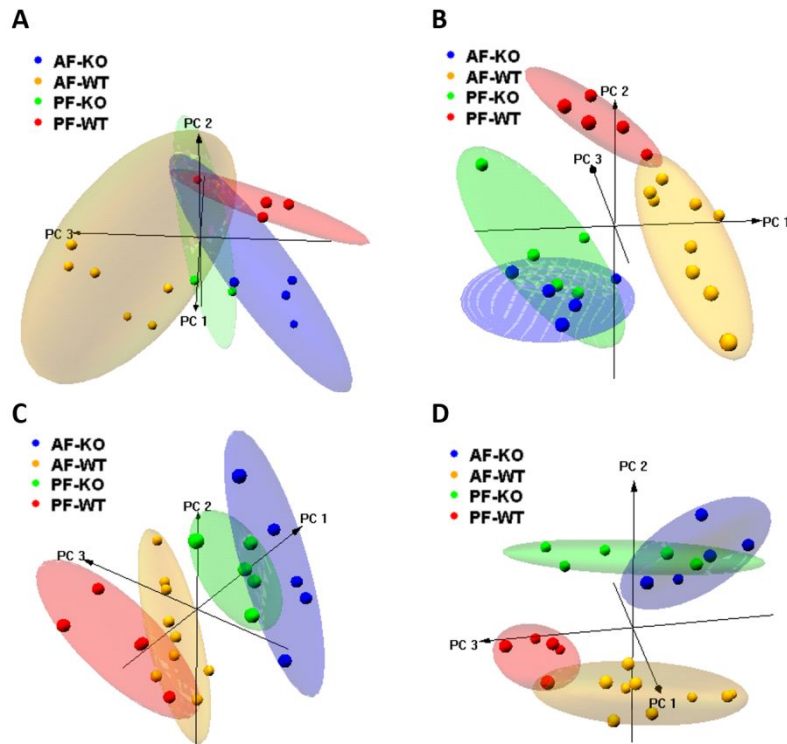

**Figure S-2.** Principal component analysis of metabolic profiling using the data acquired by (A) GC×GC-MS, (B) 2DLC-MS/MS(-), (C) 2DLC-MS/MS(+), and (D) merging all data acquired on the three platforms. AF, alcohol-fed; PF, pair-fed; WT, wild type; KO, CRAMP knockout. Principal component 1 (PC 1) explains 53%, 17%, 23%, and 21% variances, PC 2 explains 16%, 14%, 17%, and 15% variances, and PC 3 explains 6%, 10%, 11%, and 13% variances for (A) GC×GC-MS, (B) 2DLC-MS/MS(-), (C) 2DLC-MS/MS(+), and (D) merged data, respectively.

**Table S-1.** Metabolites changed in feces by alcohol detected by three platforms (i.e., AF-WT vs. PF-WT)

| 2DLC-MS (+)                                           |             |                | 2DLC-MS (-)                       |             |                | GC×GC-MS                         |             |                |
|-------------------------------------------------------|-------------|----------------|-----------------------------------|-------------|----------------|----------------------------------|-------------|----------------|
| Compound Name                                         | Fold Change | <i>p</i> Value | Compound Name                     | Fold Change | <i>p</i> Value | Compound Name                    | Fold Change | <i>p</i> Value |
| <b>Metabolites with significant abundance changes</b> |             |                |                                   |             |                |                                  |             |                |
| 2-Amino adipic acid                                   | 1.7E-01     | 5.4E-06        | (R)-2-Hydroxybutyric acid         | 5.0E-01     | 3.9E-02        | (Aminoxy)acetic acid             | 2.0E+00     | 3.2E-03        |
| 4-Indolecarbaldehyde                                  | 1.5E-01     | 8.6E-05        | (S)-(+)-1,2-Isopropylidenglycerol | 2.3E-01     | 5.7E-05        | 1,2-Pyrrolidinedicarboxylic acid | 3.7E-01     | 4.6E-02        |
| 7-Methylguanine                                       | 3.4E-01     | 4.6E-04        | 2'-Deoxyinosine                   | 5.3E-01     | 1.4E-02        | 1-Butanol                        | 1.4E+00     | 7.2E-04        |
| Acetophenone                                          | 1.6E+00     | 2.5E-03        | 2-Hydroxyvaleric acid             | 5.6E-02     | 1.6E-05        | 2-Hydroxy-3-methylbutyric acid   | 1.3E-01     | 1.3E-03        |
| Acetylcarnitine                                       | 4.4E-01     | 2.9E-02        | 2-Ketobutyric acid                | 2.5E-01     | 1.5E-02        | 2-Thiobarbituric acid            | 5.0E-01     | 3.0E-02        |
| Adenine                                               | 2.6E+00     | 2.1E-04        | 4-Nitrophenol                     | 1.5E+00     | 4.3E-02        | 4-Coumaric acid                  | 1.9E+00     | 3.0E-03        |
| Adenosine                                             | 2.9E-01     | 1.3E-03        | 6-Hydroxycaproic acid             | 9.3E-02     | 1.0E-03        | Alpha-Aminoisobutyric acid       | 3.3E-01     | 9.0E-03        |
| Alanine                                               | 7.9E-01     | 6.2E-03        | Adenine                           | 3.8E+00     | 2.4E-04        | Butyric acid                     | 1.0E-01     | 1.1E-02        |
| Alpha-Aminoisobutyric acid                            | 6.2E-01     | 2.6E-02        | Adipic acid                       | 6.1E-01     | 9.6E-03        | Ethanolamine                     | 4.0E-01     | 3.9E-03        |
| Arginine                                              | 1.6E-01     | 4.8E-04        | Alanine                           | 6.0E-01     | 1.3E-02        | Ethyl diethanolamine             | 4.8E-01     | 2.2E-02        |
| Cannabigerolic acid                                   | 5.7E+00     | 8.2E-04        | Alpha-Aminoisobutyric acid        | 4.3E-01     | 4.2E-02        | Fumaric acid                     | 2.7E-01     | 1.9E-02        |
| Cholest-4-en-3-one                                    | 1.5E+01     | 1.4E-02        | alpha-Ketoglutaric acid           | 3.7E-01     | 4.2E-02        | Glyceric acid                    | 3.2E-01     | 8.8E-03        |
| Coenzyme Q1                                           | 1.5E+00     | 1.1E-02        | Arachidonic acid                  | 3.2E+00     | 3.3E-02        | Glycerol-3-phosphate             | 3.8E-01     | 2.0E-03        |
| Cytidine                                              | 5.5E-01     | 2.2E-03        | Arginine                          | 1.4E-01     | 3.1E-04        | Glycine                          | 4.4E-01     | 3.4E-02        |
| Cytosine                                              | 6.5E-01     | 3.3E-02        | Azelaic acid                      | 1.4E+00     | 2.0E-02        | Hydroxylamine                    | 7.5E-01     | 1.9E-02        |
| Ethyl oleate                                          | 2.2E+00     | 2.7E-05        | Benzoic acid                      | 1.4E+00     | 4.8E-02        | Malic acid                       | 1.3E-01     | 2.5E-03        |
| gamma-Aminobutyric acid                               | 2.7E-01     | 3.8E-02        | Cholic acid                       | 3.9E-01     | 1.6E-02        | N-Acetylaspartic acid            | 2.4E-01     | 5.9E-03        |
| Lysine                                                | 5.4E-01     | 8.6E-03        | Deoxycholic acid                  | 4.2E+00     | 4.6E-02        | Nicotinic acid                   | 5.5E-01     | 3.2E-02        |
| Methionine sulfoxide                                  | 5.6E-01     | 2.3E-02        | Docosaehaenoic acid               | 5.0E+00     | 3.9E-03        | Valeric acid                     | 2.1E-01     | 1.5E-02        |

Supporting Information

|                                                                      |         |         |                               |         |         |                           |         |         |
|----------------------------------------------------------------------|---------|---------|-------------------------------|---------|---------|---------------------------|---------|---------|
| Methylimidazoleacetic acid                                           | 4.0E-01 | 1.6E-03 | Ethyl- $\beta$ -D-glucuronide | 5.7E+00 | 3.8E-03 | Propylene glycol          | 3.2E+00 | 1.3E-02 |
| N <sup>3</sup> ,N <sup>4</sup> -Dimethylarginine                     | 4.3E-01 | 1.6E-04 | Fumaric acid                  | 3.6E-01 | 4.5E-02 | Serine                    | 6.8E-01 | 3.4E-03 |
| N-Acetylneuraminic acid                                              | 1.3E-01 | 4.9E-02 | Glutamic acid                 | 4.2E-01 | 3.3E-02 | Succinic acid             | 6.4E-02 | 1.6E-03 |
| N-Acetylorithine                                                     | 2.5E-01 | 1.1E-02 | Glutaric acid                 | 2.2E-01 | 1.6E-04 | Taurine                   | 1.5E-01 | 2.7E-02 |
| Nicotinamide                                                         | 6.1E-01 | 1.6E-02 | Guanosine                     | 1.9E-01 | 2.7E-04 |                           |         |         |
| Nicotinic acid                                                       | 6.4E-01 | 7.5E-03 | Histidine                     | 3.7E-01 | 4.2E-03 |                           |         |         |
| Ornithine                                                            | 1.4E+00 | 2.8E-02 | Inosine                       | 5.2E-02 | 6.2E-05 |                           |         |         |
| Phenylalanine                                                        | 6.3E-01 | 2.0E-02 | Isobutyric acid               | 1.9E-01 | 3.6E-05 |                           |         |         |
| Pipecolic acid                                                       | 6.6E-01 | 4.5E-02 | Lactic acid                   | 2.8E-01 | 2.1E-03 |                           |         |         |
| Sarcosine                                                            | 8.0E-01 | 1.8E-02 | Levulinic acid                | 5.5E-01 | 1.3E-02 |                           |         |         |
| Serine                                                               | 6.0E-01 | 4.5E-02 | L-Pyroglutamic acid           | 6.4E-01 | 3.5E-03 |                           |         |         |
| Taurine                                                              | 5.6E-01 | 1.5E-02 | Maleic acid                   | 7.9E-01 | 4.6E-02 |                           |         |         |
| Taurocholic acid                                                     | 1.5E-05 | 0.0E+00 | Malic acid                    | 1.2E-01 | 2.5E-04 |                           |         |         |
| Tetrahydrocannabinol                                                 | 3.2E+00 | 1.7E-03 | Malonic acid                  | 2.6E-01 | 1.3E-04 |                           |         |         |
| Tyrosine                                                             | 6.2E-01 | 6.3E-04 | N-Ethylglycine                | 4.3E-01 | 4.2E-02 |                           |         |         |
| Urocanic acid                                                        | 1.4E+00 | 2.5E-02 | Nicotinic acid                | 5.6E-01 | 2.0E-02 |                           |         |         |
| Xanthurenic acid                                                     | 1.7E-01 | 4.3E-05 | Oleic acid                    | 4.1E+00 | 1.6E-02 |                           |         |         |
|                                                                      |         |         | Oxalic acid                   | 4.5E+00 | 8.5E-04 |                           |         |         |
|                                                                      |         |         | Palmitic acid                 | 3.0E+00 | 2.5E-03 |                           |         |         |
|                                                                      |         |         | Propionic acid                | 9.3E-02 | 1.5E-03 |                           |         |         |
|                                                                      |         |         | Serine                        | 5.6E-01 | 2.8E-02 |                           |         |         |
|                                                                      |         |         | Succinic acid                 | 7.9E-02 | 5.2E-05 |                           |         |         |
|                                                                      |         |         | Sucrose                       | 1.2E-01 | 1.4E-04 |                           |         |         |
|                                                                      |         |         | Taurine                       | 6.8E-01 | 2.5E-02 |                           |         |         |
|                                                                      |         |         | Uridine                       | 3.4E-01 | 1.3E-03 |                           |         |         |
|                                                                      |         |         | Urocanic acid                 | 2.1E+00 | 2.9E-03 |                           |         |         |
| <b>Metabolites without statistical significant abundance changes</b> |         |         |                               |         |         |                           |         |         |
| 1-Methylhistidine                                                    | 6.5E-01 | 6.6E-02 | (+/-)12-HpETE                 | 5.0E-01 | 5.6E-02 | 1-Hexanol                 | 9.1E-01 | 6.5E-01 |
| 2-Aminonicotinic acid                                                | 7.2E-01 | 8.0E-02 | HODE                          | 1.7E+00 | 2.6E-01 | 2-Buten-1-ol              | 1.1E+00 | 5.7E-01 |
| 3,4-Dimethylbenzoic acid                                             | 1.7E+00 | 1.7E-01 | 2-Hydroxycaproic acid         | 1.3E+00 | 6.8E-01 | Alpha-Hydroxybutyric acid | 7.3E-01 | 1.7E-01 |

## Supporting Information

|                            |         |         |                                                    |         |         |                                       |         |         |
|----------------------------|---------|---------|----------------------------------------------------|---------|---------|---------------------------------------|---------|---------|
| 3-Hydroxypyridine          | 7.7E-01 | 2.9E-01 | 3-Hydroxybutyric acid                              | 3.3E+00 | 7.9E-02 | 3,3-Dimethyl-2-butanol                | 1.1E+00 | 6.1E-01 |
| 4-Methyl-5-thiazoleethanol | 1.4E+00 | 3.2E-01 | 4-Methyl-2-oxovaleric acid                         | 2.0E-01 | 8.9E-02 | 3-Hydroxy-3-phenylpropionic acid      | 1.3E+00 | 1.5E-01 |
| Acetylcholine              | 9.9E-01 | 9.2E-01 | 8(S)-Hydroxy-(5Z,9E,11Z,14Z)-eicosatetraenoic acid | 1.1E+00 | 1.0E+00 | 3-Hydroxybutyric acid                 | 1.2E+00 | 8.1E-01 |
| Alanylproline              | 5.7E-01 | 1.3E-01 | Adrenic acid                                       | 8.1E-01 | 5.4E-01 | 3-Methylbutanoic acid                 | 6.7E-01 | 7.1E-01 |
| Alpha-Amino adipic acid    | 8.8E-01 | 5.6E-01 | Asparagine                                         | 1.4E+00 | 4.8E-01 | 4-Hydroxybenzeneacetic acid           | 5.0E-01 | 1.5E-01 |
| Anserine                   | 9.8E-01 | 7.4E-01 | Aspartic acid                                      | 4.6E-01 | 1.4E-01 | 5-Aminovaleric acid                   | 2.3E-01 | 4.6E-01 |
| Aspartic acid              | 5.3E-01 | 4.5E-01 | Citrulline                                         | 1.3E+00 | 4.1E-01 | 6-Methyl-2-(methylthio)-4-pyrimidinol | 8.2E-01 | 4.9E-01 |
| Betaine                    | 1.1E+00 | 3.8E-01 | Creatinine                                         | 8.8E-01 | 8.4E-01 | 9-Hexadecenoic acid                   | 1.4E+00 | 4.4E-01 |
| Carnitine                  | 1.2E+00 | 1.8E-01 | Cystine                                            | 1.0E+00 | 4.7E-01 | Acetimidamide                         | 1.3E+00 | 7.2E-02 |
| Carnosine                  | 5.5E-01 | 1.5E-01 | Dihomo-gamma-Linolenic acid                        | 2.2E+00 | 3.1E-01 | Alanine                               | 7.8E-01 | 1.3E-01 |
| Choline                    | 1.4E+00 | 1.0E-01 | Glyceraldehyde 3-phosphate                         | 1.2E+00 | 7.1E-01 | Asparagine                            | 1.8E+00 | 1.2E-01 |
| Citrulline                 | 1.1E+00 | 9.3E-01 | $\beta$ -Leucine                                   | 1.1E+00 | 8.9E-01 | Aspartic acid                         | 4.6E-01 | 1.4E-01 |
| Creatine                   | 1.4E+00 | 1.6E-01 | Glutamine                                          | 9.4E-01 | 5.3E-01 | Benzeneacetic acid                    | 9.7E-01 | 7.4E-01 |
| Creatinine                 | 8.5E-01 | 7.5E-01 | Glycine                                            | 8.6E-01 | 3.1E-01 | Benzoic acid                          | 1.3E+00 | 1.9E-01 |
| Cystine                    | 1.4E+00 | 5.6E-01 | Glycyl-L-leucine                                   | 9.4E-01 | 7.3E-01 | Decanoic acid                         | 4.2E-01 | 1.4E-01 |
| Ethanolamine               | 7.2E-01 | 2.9E-01 | Hexanoic acid                                      | 2.7E+00 | 1.2E-01 | Diacetic acid                         | 6.7E-01 | 3.0E-01 |
| Ethyl palmitoleate         | 1.4E+00 | 2.1E-01 | Hypoxanthine                                       | 6.0E-01 | 1.4E-01 | Ethyl hydroxycarbamate                | 1.3E+00 | 3.7E-01 |
| Glutamic acid              | 4.9E-01 | 7.9E-02 | Isocitric acid                                     | 1.4E+00 | 8.2E-01 | Ethylene glycol                       | 1.3E+00 | 2.3E-01 |
| Glutamine                  | 7.7E-01 | 2.8E-01 | Itaconic acid                                      | 6.9E-01 | 1.5E-01 | Glutamic acid                         | 9.4E-01 | 6.5E-01 |
| Glycylproline              | 7.1E-01 | 1.5E-01 | Alpha-Amino adipic acid                            | 1.0E+00 | 7.1E-01 | Glyceraldehyde                        | 8.9E-01 | 7.3E-01 |
| Guanine                    | 6.6E-01 | 2.4E-01 | Cysteine-S-sulfate                                 | 8.1E-01 | 4.9E-01 | Glycerol                              | 1.2E+00 | 9.4E-01 |
| Histidine                  | 5.8E-01 | 5.3E-02 | Leukotriene B4                                     | 8.6E-01 | 9.6E-01 | Glycolic acid                         | 7.1E-01 | 2.7E-01 |
| Hypoxanthine               | 6.3E-01 | 1.2E-01 | Lipoxin A4                                         | 8.0E-01 | 4.1E-01 | Hydracrylic acid                      | 1.1E+00 | 9.9E-01 |

Supporting Information

|                          |         |         |                           |         |         |                         |         |         |
|--------------------------|---------|---------|---------------------------|---------|---------|-------------------------|---------|---------|
| Isoleucine               | 8.0E-01 | 2.7E-01 | Rhamnose                  | 8.6E-01 | 4.3E-01 | Isobutyric acid         | 7.1E-01 | 3.5E-01 |
| Leucine                  | 7.0E-01 | 9.5E-02 | Methionine                | 7.2E-01 | 9.6E-02 | Isoleucine              | 8.6E-01 | 2.2E-01 |
| Leucylproline            | 8.3E-01 | 5.0E-01 | Methyl Salicylate         | 5.5E-01 | 1.1E-01 | Lactic acid             | 6.4E-01 | 4.0E-01 |
| L-Pyroglutamic acid      | 6.7E-01 | 1.1E-01 | N-Acetyl-D-Glucosamine    | 7.4E-01 | 1.8E-01 | Leucine                 | 9.2E-01 | 4.8E-01 |
| Methionine               | 8.7E-01 | 3.2E-01 | N-Acetyl-L-glutamic acid  | 7.8E-01 | 2.3E-01 | Linoelaidic acid        | 1.5E+00 | 4.8E-01 |
| N6,N6,N6-Trimethyllysine | 7.0E-01 | 2.4E-01 | N-Acetylneuraminic acid   | 7.5E-01 | 2.0E-01 | L-Pyroglutamic acid     | 5.7E-01 | 1.8E-01 |
| N6-Acetyllysine          | 1.2E+00 | 2.8E-01 | N-Acetylornithine         | 7.0E-01 | 1.3E-01 | Lysine                  | 4.4E-01 | 1.3E-01 |
| N-Acetyl-galactosamine   | 9.9E-01 | 7.4E-01 | Ornithine                 | 1.4E+00 | 4.2E-01 | Methionine              | 8.8E-01 | 1.5E-01 |
| N-Acetyl-Glucosamine     | 8.1E-01 | 3.8E-01 | Pantothenic acid          | 1.2E+00 | 2.0E-01 | Methylthiouracil        | 5.6E-01 | 1.2E-01 |
| N-Methyl-2-pyrrolidone   | 4.0E-01 | 5.6E-02 | Phenylalanine             | 8.8E-01 | 3.3E-01 | Myristic acid           | 1.0E+00 | 8.9E-01 |
| Octadecanamine           | 1.5E+00 | 1.4E-01 | Phenylpyruvic acid        | 3.0E+00 | 2.0E-01 | Nonanoic acid           | 1.4E+00 | 1.8E-01 |
| Proline                  | 8.2E-01 | 2.0E-01 | Prostaglandin G2          | 9.8E-01 | 7.3E-01 | Oleic acid              | 2.1E+00 | 2.0E-01 |
| Threonine                | 7.2E-01 | 7.5E-02 | Pyruvic acid              | 6.3E-01 | 5.7E-01 | Oxalic acid             | 1.0E+00 | 9.7E-01 |
| Trans-4-Hydroxyproline   | 8.0E-01 | 9.5E-01 | Salicylic acid            | 2.9E+00 | 5.4E-02 | Palmitic acid           | 2.5E+00 | 1.3E-01 |
| Tryptophan               | 9.2E-01 | 4.2E-01 | Thiamine                  | 1.1E+00 | 9.5E-01 | Pentadecanoic acid      | 1.2E+00 | 5.8E-01 |
| Valine                   | 9.6E-01 | 7.6E-01 | Threonine                 | 8.8E-01 | 2.6E-01 | Perfluoropropionic acid | 1.5E+00 | 2.4E-01 |
| Valylproline             | 5.5E-01 | 2.3E-01 | Trans-4-Hydroxy-L-proline | 5.0E-01 | 4.2E-01 | Phenylalanine           | 9.0E-01 | 5.1E-01 |
|                          |         |         | Trans-Ferulic acid        | 1.0E+00 | 6.4E-01 | Proline                 | 9.4E-01 | 8.8E-01 |
|                          |         |         | Tryptophan                | 7.7E-01 | 2.3E-01 | Propionic acid          | 5.3E-01 | 1.4E-01 |
|                          |         |         | Tyrosine                  | 8.5E-01 | 5.2E-01 | Stearic acid            | 2.2E+00 | 1.1E-01 |
|                          |         |         | Uracil                    | 5.5E-01 | 5.7E-02 | Threonine               | 7.2E-01 | 1.5E-01 |
|                          |         |         | Xanthine                  | 6.6E-01 | 5.0E-02 | Thymol                  | 1.3E+00 | 9.7E-02 |
|                          |         |         |                           |         |         | Tyrosine                | 7.6E-01 | 2.3E-01 |
|                          |         |         |                           |         |         | Uracil                  | 7.2E-01 | 2.7E-01 |
|                          |         |         |                           |         |         | Valine                  | 9.3E-01 | 4.6E-01 |

**Table S-2.** Metabolites changed in feces by CRAMP knockout detected by three platforms

| 2DLC-MS (+)                                                          |             |                | 2DLC-MS (-)                |             |                | GC×GC-MS                                           |             |                |
|----------------------------------------------------------------------|-------------|----------------|----------------------------|-------------|----------------|----------------------------------------------------|-------------|----------------|
| Compound Name                                                        | Fold Change | <i>p</i> Value | Compound Name              | Fold Change | <i>p</i> Value | Compound Name                                      | Fold Change | <i>p</i> Value |
| <b>Metabolites with significant abundance changes</b>                |             |                |                            |             |                |                                                    |             |                |
| 1-Methyl-L-histidine                                                 | 4.3E-01     | 1.0E-02        | 4-Nitrophenol              | 5.6E+00     | 4.0E-02        | (Aminooxy)acetic acid                              | 2.4E+00     | 7.4E-03        |
| Acetylcholine                                                        | 1.0E+02     | 1.3E-04        | Alpha-Aminoisobutyric acid | 5.1E-01     | 1.5E-02        | 1,2-Pyrrolidinedicarboxylic acid                   | 3.1E-01     | 3.7E-02        |
| Adenine                                                              | 2.3E-01     | 1.2E-02        | Cholic acid                | 3.4E-01     | 1.2E-02        | 1-Butanol                                          | 1.8E+00     | 2.6E-02        |
| Adenosine                                                            | 4.9E-01     | 3.8E-02        | β-Leucine                  | 1.7E+00     | 2.3E-02        | 1-Hexadecanol                                      | 1.6E+00     | 4.0E-02        |
| Alanine                                                              | 7.2E-01     | 2.4E-03        | Glutamic acid              | 5.5E-01     | 2.3E-02        | 2-Hydroxy-3-methylbutyric acid                     | 8.7E-02     | 9.8E-03        |
| Anserine                                                             | 1.8E+00     | 5.1E-03        | Glutaric acid              | 3.3E-01     | 2.0E-02        | Alpha-Aminoisobutyric acid                         | 3.4E-01     | 3.8E-02        |
| Creatinine                                                           | 5.8E+00     | 3.3E-02        | Glycine                    | 7.2E-01     | 1.0E-03        | 4-Coumaric acid                                    | 3.1E+00     | 6.1E-03        |
| Cystine                                                              | 1.5E+00     | 1.3E-02        | Lactic acid                | 5.1E-01     | 6.1E-03        | 9-Hexadecenoic acid                                | 3.1E+00     | 3.3E-02        |
| Cytidine                                                             | 4.7E-01     | 9.5E-04        | L-Pyroglutamic acid        | 5.5E-01     | 3.9E-03        | Glycine                                            | 3.5E-01     | 2.1E-02        |
| Glutamic acid                                                        | 6.2E-01     | 3.9E-03        | Malonic acid               | 2.7E-01     | 2.8E-04        | Linoelaidic acid                                   | 1.8E+00     | 4.9E-02        |
| Methionine                                                           | 8.0E-01     | 3.6E-02        | Phenylpyruvic acid         | 7.4E+00     | 7.9E-03        | Methionine                                         | 5.9E-01     | 1.7E-02        |
| N <sub>3</sub> ,N <sub>4</sub> -Dimethyl-L-arginine                  | 6.3E-01     | 3.6E-02        | Propionic acid             | 1.9E-01     | 2.1E-02        | Lysine                                             | 2.0E-01     | 3.4E-02        |
| Nicotinamide                                                         | 3.3E-01     | 3.5E-03        | Salicylic acid             | 5.3E+00     | 3.3E-03        | N-Acetylaspartic acid                              | 1.4E-01     | 2.0E-02        |
| N-Methyl-2-pyrrolidone                                               | 2.1E+01     | 3.9E-04        | Thiamine                   | 2.9E-01     | 2.1E-02        | Octanoic acid                                      | 1.2E+00     | 3.2E-02        |
| Sarcosine                                                            | 3.2E+00     | 8.8E-03        | Trans-Ferulic acid         | 3.1E+00     | 1.7E-02        | Palmitic acid                                      | 8.2E+00     | 8.6E-03        |
| Taurine                                                              | 5.0E-01     | 4.1E-02        | Uracil                     | 3.0E+00     | 2.6E-03        | Serine                                             | 6.1E-01     | 4.8E-02        |
| Threonine                                                            | 7.7E-01     | 7.2E-03        |                            |             |                | Stearic acid                                       | 7.0E+00     | 2.5E-03        |
| Tyrosine                                                             | 6.2E-01     | 2.1E-03        |                            |             |                | Succinic acid                                      | 9.5E-02     | 3.1E-02        |
| Xanthurenic acid                                                     | 3.8E-01     | 8.4E-03        |                            |             |                |                                                    |             |                |
| <b>Metabolites without statistical significant abundance changes</b> |             |                |                            |             |                |                                                    |             |                |
| 2-Amino adipic acid                                                  | 7.7E-01     | 2.0E-01        | (R)-2-Hydroxybutyric acid  | 3.7E-01     | 5.1E-02        | 1,6-Anhydro-2,3-O-isopropylidene-α-D-mannopyranose | 5.4E-01     | 3.3E-01        |

## Supporting Information

|                            |         |         |                                     |         |         |                                       |         |         |
|----------------------------|---------|---------|-------------------------------------|---------|---------|---------------------------------------|---------|---------|
| 3,4-Dimethylbenzoic acid   | 8.5E-01 | 8.2E-01 | (S)-(+)-1,2-Isopropylidene-glycerol | 5.9E-01 | 1.8E-01 | 1-Hexanol                             | 9.3E-01 | 8.1E-01 |
| 3-Hydroxypyridine          | 1.0E+00 | 8.6E-01 | HODE                                | 7.2E-01 | 3.0E-01 | 2-Butanol                             | 1.5E+00 | 1.5E-01 |
| 4-Indolecarbaldehyde       | 4.4E-01 | 1.2E-01 | 2'-Deoxyinosine                     | 6.6E-01 | 8.0E-02 | 2-Buten-1-ol                          | 1.2E+00 | 4.4E-01 |
| 4-Methyl-5-thiazoleethanol | 8.1E-01 | 3.8E-01 | 2-Hydroxycaproic acid               | 1.1E+00 | 9.1E-01 | Alpha-Hydroxybutyric acid             | 4.0E-01 | 1.0E-01 |
| 7-Methylguanine            | 6.6E-01 | 9.7E-02 | 2-Ketobutyric acid                  | 5.2E-01 | 1.1E-01 | 2-Methylpropionic acid                | 8.0E-01 | 7.2E-01 |
| Acetyl-L-carnitine         | 5.6E-01 | 8.5E-01 | 3-Hydroxybutyric acid               | 2.2E+00 | 8.2E-02 | 2-Phenylbutyric acid                  | 3.6E+00 | 6.0E-02 |
| Alanyl-L-proline           | 6.7E-01 | 5.6E-01 | 4-Methyl-2-oxovaleric acid          | 1.7E+00 | 1.9E-01 | 2-Thiobarbituric acid                 | 3.6E-01 | 6.9E-02 |
| Alpha-Aminoadipic acid     | 3.1E+00 | 2.4E-01 | Adenine                             | 2.1E+00 | 2.0E-01 | 3,3-Dimethyl-2-butanol                | 8.5E-01 | 1.4E-01 |
| Alpha-Aminoisobutyric acid | 1.1E+00 | 5.2E-01 | Adipic acid                         | 6.3E-01 | 1.2E-01 | 3-Hydroxy-3-phenylpropionic acid      | 1.0E+00 | 9.3E-01 |
| Arginine                   | 6.7E-01 | 2.7E-01 | Adrenic acid                        | 5.8E-01 | 3.3E-01 | 3-Hydroxybutyric acid                 | 2.0E+00 | 4.8E-01 |
| Aspartic acid              | 6.0E-01 | 7.1E-01 | Alanine                             | 9.6E-01 | 8.8E-01 | 3-Methylbutanoic acid                 | 6.5E-01 | 4.8E-01 |
| Betaine                    | 1.2E+00 | 4.9E-01 | alpha-Ketoglutaric acid             | 6.7E-01 | 4.6E-01 | 4-Hydroxybenzeneacetic acid           | 6.6E-01 | 2.7E-01 |
| Cannabigerolic acid        | 1.2E+00 | 5.4E-01 | Arachidonic acid                    | 2.5E+00 | 8.1E-02 | 5-Aminovaleric acid                   | 8.8E-02 | 4.8E-01 |
| Carnitine                  | 1.3E+00 | 3.7E-01 | Arginine                            | 6.4E-01 | 3.0E-01 | 6-Methyl-2-(methylthio)-4-pyrimidinol | 7.5E-01 | 5.0E-01 |
| Carnosine                  | 4.6E-01 | 1.2E-01 | Asparagine                          | 8.2E-01 | 6.4E-01 | acetimidamide                         | 1.1E+00 | 2.8E-01 |
| Cholest-4-en-3-one         | 1.1E+00 | 4.8E-01 | Aspartic acid                       | 8.8E-01 | 6.7E-01 | Alanine                               | 8.3E-01 | 4.7E-01 |
| Choline                    | 1.2E+00 | 1.6E-01 | Azelaic acid                        | 1.3E+00 | 1.9E-01 | Aspartic acid                         | 5.8E-01 | 3.0E-01 |
| Citrulline                 | 7.3E-01 | 1.6E-01 | Benzoic acid                        | 1.8E+00 | 1.6E-01 | Benzeneacetic acid                    | 6.0E-01 | 5.7E-01 |
| Coenzyme Q1                | 8.9E-01 | 4.4E-01 | Citrulline                          | 8.0E-01 | 2.3E-01 | Benzoic acid                          | 1.2E+00 | 4.6E-01 |
| Creatine                   | 1.1E+00 | 5.4E-01 | Creatinine                          | 9.5E-01 | 8.9E-01 | Butyric acid                          | 2.1E-01 | 5.8E-02 |
| Cytosine                   | 1.5E+00 | 2.6E-01 | Cystine                             | 1.2E+00 | 4.4E-01 | Cysteine                              | 6.2E-01 | 3.7E-01 |
| Ethanolamine               | 8.2E-01 | 6.2E-01 | Deoxycholic acid                    | 2.1E+00 | 2.4E-01 | Cytosine                              | 1.3E+00 | 7.1E-02 |
| Ethyl palmitoleate         | 1.1E+00 | 9.1E-01 | Dihomo-gamma-Linolenic acid         | 4.7E-01 | 4.2E-01 | Decanoic acid                         | 2.0E+00 | 4.9E-01 |



## Supporting Information

|                             |         |         |                            |         |         |                        |         |         |
|-----------------------------|---------|---------|----------------------------|---------|---------|------------------------|---------|---------|
| Gamma-Aminobutyric acid     | 3.8E-01 | 3.3E-01 | Glyceraldehyde 3-phosphate | 9.0E-01 | 6.5E-01 | Dodecanoic acid        | 6.2E-01 | 5.1E-01 |
| Glutamine                   | 1.0E+00 | 9.7E-01 | Docosaehaenoic acid        | 2.9E+00 | 8.6E-02 | L-Pyroglutamic acid    | 9.1E-01 | 8.9E-01 |
| Guanine                     | 1.7E+00 | 4.9E-01 | Ethyl-β-D-glucuronide      | 2.4E-01 | 8.5E-02 | Ethanolamine           | 2.4E+00 | 2.0E-01 |
| Histidine                   | 8.4E-01 | 4.4E-01 | Fumaric acid               | 7.3E-01 | 5.6E-01 | Ethyl hydroxycarbamate | 3.0E-01 | 2.1E-01 |
| Hypoxanthine                | 8.5E-01 | 7.1E-01 | Glutamine                  | 8.8E-01 | 7.9E-01 | Ethyl-diethanolamine   | 4.3E-01 | 1.4E-01 |
| Isoleucine                  | 8.9E-01 | 6.5E-01 | Glycyl-L-leucine           | 7.9E-01 | 4.8E-01 | Ethylene glycol        | 1.9E+00 | 7.2E-02 |
| Leucine                     | 9.5E-01 | 8.5E-01 | Hexanoic acid              | 3.9E-01 | 7.3E-01 | Fumaric acid           | 3.2E-01 | 1.4E-01 |
| Leucylproline               | 5.6E-01 | 1.2E-01 | Histidine                  | 6.4E-01 | 1.2E-01 | Glutamic acid          | 8.3E-01 | 2.0E-01 |
| L-Pyroglutamic acid         | 8.4E-01 | 3.1E-01 | Hypoxanthine               | 9.5E-01 | 9.7E-01 | Glyceraldehyde         | 1.4E+00 | 4.3E-01 |
| Lysine                      | 7.0E-01 | 9.7E-02 | Inosine                    | 6.1E-01 | 4.2E-01 | Glyceric acid          | 5.6E-01 | 9.3E-02 |
| Methionine sulfoxide        | 7.1E-01 | 2.6E-01 | Isobutyric acid            | 1.8E-01 | 2.0E-01 | Glycerol               | 1.3E+00 | 1.9E-01 |
| Methylimidazoleacetic acid  | 1.3E+00 | 3.8E-01 | Isocitric acid             | 9.7E-01 | 6.6E-01 | Glycerol-3-phosphate   | 1.0E+00 | 8.1E-01 |
| N6,N6,N6-Trimethyl-L-lysine | 8.4E-01 | 7.0E-01 | Itaconic acid              | 8.8E-01 | 7.2E-01 | Glycolic acid          | 5.6E-01 | 1.8E-01 |
| N6-Acetyl-L-lysine          | 1.0E+00 | 9.8E-01 | alpha-Amino adipic acid    | 1.3E+00 | 3.7E-01 | Hydroxylamine          | 1.0E+00 | 8.3E-01 |
| N-Acetyl-D-Glucosamine      | 1.3E+00 | 3.8E-01 | Cysteine-S-sulfate         | 1.1E+00 | 7.7E-01 | Isoleucine             | 8.2E-01 | 3.1E-01 |
| N-Acetylneuraminic acid     | 6.6E-01 | 5.7E-01 | Leukotriene B4             | 8.1E-01 | 8.0E-01 | Lactic acid            | 4.9E-01 | 3.9E-01 |
| N-Acetylornithine           | 3.1E-01 | 1.1E-01 | Levulinic acid             | 6.9E-01 | 1.4E-01 | Leucine                | 8.6E-01 | 3.8E-01 |
| Nicotinic acid              | 8.3E-01 | 3.6E-01 | Lipoxin A4                 | 1.3E+00 | 4.1E-01 | Malic acid             | 2.4E-01 | 5.6E-02 |
| Ornithine                   | 6.5E-01 | 7.6E-02 | Rhamnose                   | 1.0E+00 | 7.1E-01 | Methylthiouracil       | 5.9E-01 | 2.7E-01 |
| Phenylalanine               | 7.9E-01 | 1.5E-01 | Maleic acid                | 7.3E-01 | 1.1E-01 | Myristic acid          | 1.9E+00 | 1.7E-01 |
| Pipecolic acid              | 6.9E-01 | 5.4E-02 | Malic acid                 | 6.2E-01 | 2.2E-01 | Nicotinic acid         | 6.7E-01 | 2.8E-01 |
| Proline                     | 8.4E-01 | 3.3E-01 | Methionine                 | 8.3E-01 | 1.9E-01 | Nonanoic acid          | 1.2E+00 | 4.9E-01 |
| Serine                      | 8.2E-01 | 1.5E-01 | Methyl Salicylate          | 1.0E+00 | 6.8E-01 | Oleic acid             | 4.1E+00 | 5.9E-02 |
| Tetrahydrocannabinol        | 9.4E-01 | 8.0E-02 | N-Acetyl-D-Glucosamine     | 1.4E+00 | 4.9E-01 | Ornithine              | 5.3E-01 | 2.1E-01 |
| Trans-4-Hydroxy-L-proline   | 6.0E-01 | 6.6E-01 | N-Acetyl-DL-glutamic acid  | 1.1E+00 | 6.1E-01 | Oxalic acid            | 9.6E-01 | 6.8E-01 |

Supporting Information

|               |         |         |                           |         |         |                    |         |         |
|---------------|---------|---------|---------------------------|---------|---------|--------------------|---------|---------|
| Tryptophan    | 7.8E-01 | 1.9E-01 | N-Acetyl-L-glutamic acid  | 8.4E-01 | 9.7E-01 | Pentadecanoic acid | 3.3E+00 | 8.0E-02 |
| Urocanic acid | 1.2E+00 | 4.6E-01 | N-Acetylneuraminic acid   | 7.3E+00 | 7.1E-02 | Valeric acid       | 3.0E-01 | 1.9E-01 |
| Valine        | 9.2E-01 | 3.9E-01 | N-Acetylmethionine        | 1.1E+00 | 8.1E-01 | Phenylalanine      | 8.5E-01 | 2.9E-01 |
| Valylproline  | 9.7E-01 | 8.6E-01 | Nicotinic acid            | 8.3E-01 | 3.5E-01 | Phloretic acid     | 9.0E-01 | 7.3E-01 |
|               |         |         | Oleic acid                | 4.6E+00 | 1.3E-01 | Proline            | 7.7E-01 | 5.4E-01 |
|               |         |         | Ornithine                 | 8.3E-01 | 2.3E-01 | Propionic acid     | 9.3E-01 | 9.5E-01 |
|               |         |         | Oxalic acid               | 2.9E+00 | 5.9E-02 | Propylene glycol   | 1.8E+00 | 9.4E-01 |
|               |         |         | Palmitic acid             | 1.7E+00 | 3.7E-01 | Taurine            | 1.6E-01 | 8.8E-02 |
|               |         |         | Pantothenic acid          | 7.5E-01 | 4.6E-01 | Threonine          | 6.1E-01 | 1.6E-01 |
|               |         |         | Phenylalanine             | 7.7E-01 | 2.5E-01 | Thymol             | 1.3E+00 | 3.7E-01 |
|               |         |         | Prostaglandin G2          | 1.5E+00 | 3.9E-01 | Tyrosine           | 8.3E-01 | 2.0E-01 |
|               |         |         | Pyruvic acid              | 1.5E+00 | 2.4E-01 | Uracil             | 8.5E-01 | 7.2E-01 |
|               |         |         | Serine                    | 8.3E-01 | 2.6E-01 | Urea               | 1.1E+00 | 5.8E-01 |
|               |         |         | Succinic acid             | 3.4E-01 | 5.2E-02 | Valine             | 8.4E-01 | 2.7E-01 |
|               |         |         | Sucrose                   | 5.4E-01 | 2.1E-01 |                    |         |         |
|               |         |         | Taurine                   | 6.5E-01 | 1.6E-01 |                    |         |         |
|               |         |         | Threonine                 | 9.3E-01 | 3.9E-01 |                    |         |         |
|               |         |         | trans-4-Hydroxy-L-proline | 4.8E-01 | 6.0E-01 |                    |         |         |
|               |         |         | Tryptophan                | 8.5E-01 | 5.2E-01 |                    |         |         |
|               |         |         | Tyrosine                  | 8.8E-01 | 4.6E-01 |                    |         |         |
|               |         |         | Uric acid                 | 6.1E-01 | 6.0E-01 |                    |         |         |
|               |         |         | Uridine                   | 1.5E+00 | 1.4E-01 |                    |         |         |
|               |         |         | Urocanic acid             | 6.9E-01 | 1.5E-01 |                    |         |         |
|               |         |         | Xanthine                  | 7.0E-01 | 3.4E-01 |                    |         |         |
|               |         |         | β-D-Glucopyranuronic acid | 1.9E+00 | 2.3E-01 |                    |         |         |

---

**Table S-3.** Metabolites changed in feces by CRAMP knockout exposed to alcohol detected by three platforms (i.e., AF-WT vs. AF-KO)

| 2DLC-MS (+)                                           |             |                | 2DLC-MS (-)                         |             |                | GC×GC-MS                         |             |                |
|-------------------------------------------------------|-------------|----------------|-------------------------------------|-------------|----------------|----------------------------------|-------------|----------------|
| Compound Name                                         | Fold Change | <i>p</i> Value | Compound Name                       | Fold Change | <i>p</i> Value | Compound Name                    | Fold Change | <i>p</i> Value |
| <b>Metabolites with significant abundance changes</b> |             |                |                                     |             |                |                                  |             |                |
| Acetylcholine                                         | 9.7E+01     | 1.4E-05        | (S)-(+)-1,2-Isopropylidene-glycerol | 3.3E+00     | 1.9E-02        | Alpha-Aminoisobutyric acid       | 4.0E+00     | 2.3E-02        |
| Alpha-Amino adipic acid                               | 1.8E+00     | 2.8E-02        | 2-Ketobutyric acid                  | 3.3E+00     | 5.1E-03        | 3,3-Dimethyl-2-butanol           | 5.9E-01     | 6.3E-03        |
| Alpha-Aminoisobutyric acid                            | 2.1E+00     | 1.7E-03        | Alpha-Amino adipic acid             | 1.7E+00     | 1.6E-02        | 3-Hydroxy-3-phenylpropionic acid | 7.2E-01     | 3.6E-02        |
| Citrulline                                            | 4.1E-01     | 2.9E-02        | Asparagine                          | 1.3E-01     | 1.6E-02        | Acetimidamide                    | 6.3E-01     | 1.2E-02        |
| Cytidine                                              | 5.8E-01     | 2.4E-02        | Cholic acid                         | 4.7E-01     | 3.6E-02        | Glycerol-3-phosphate             | 1.6E+00     | 1.6E-02        |
| Cytosine                                              | 6.4E-01     | 1.3E-02        | Citrulline                          | 4.2E-01     | 6.7E-03        | Malic acid                       | 3.1E+00     | 2.9E-02        |
| Ethyl palmitoleate                                    | 3.0E+00     | 3.5E-02        | Creatinine                          | 5.5E-01     | 4.2E-02        | Nicotinic acid                   | 2.0E+00     | 1.2E-02        |
| N <sub>3</sub> ,N <sub>4</sub> -Dimethyl-L-arginine   | 1.9E+00     | 4.2E-02        | Cysteine-S-sulfate                  | 3.9E-01     | 2.4E-02        | Oleic acid                       | 3.3E+00     | 4.1E-02        |
| N-Acetylneuraminic acid                               | 5.9E+00     | 3.2E-02        | Glutaric acid                       | 2.0E+00     | 1.6E-02        | Valeric acid                     | 7.3E-01     | 5.0E-03        |
| N-Acetylornithine                                     | 2.3E+00     | 9.5E-05        | Hexanoic acid                       | 6.4E-01     | 4.1E-02        | Propylene glycol                 | 4.0E-01     | 2.4E-02        |
| Nicotinic acid                                        | 1.6E+00     | 1.2E-02        | Malic acid                          | 3.8E+00     | 2.7E-03        |                                  |             |                |
| N-Methyl-2-pyrrolidone                                | 1.1E+01     | 2.7E-05        | N-Acetyl-L-glutamic acid            | 3.2E+00     | 2.5E-02        |                                  |             |                |
| Taurine                                               | 2.4E+00     | 4.1E-02        | N-Acetylneuraminic acid             | 2.2E+00     | 3.2E-02        |                                  |             |                |
| Tyrosine                                              | 5.7E-01     | 4.8E-02        | Nicotinic acid                      | 1.7E+00     | 6.9E-03        |                                  |             |                |
| Valylproline                                          | 3.6E+00     | 2.8E-04        | Ornithine                           | 4.2E-01     | 7.2E-03        |                                  |             |                |
|                                                       |             |                | Phenylpyruvic acid                  | 7.5E-02     | 2.0E-02        |                                  |             |                |
|                                                       |             |                | Prostaglandin G <sub>2</sub>        | 5.9E-01     | 4.1E-02        |                                  |             |                |
|                                                       |             |                | Rhamnose                            | 2.1E+00     | 2.2E-05        |                                  |             |                |
|                                                       |             |                | Succinic acid                       | 2.3E+00     | 1.5E-02        |                                  |             |                |
|                                                       |             |                | Sucrose                             | 2.4E+00     | 3.8E-02        |                                  |             |                |
|                                                       |             |                | Trans-4-Hydroxy-L-proline           | 5.8E-01     | 2.2E-02        |                                  |             |                |

## Supporting Information

|                                                                      |         |         |                            |         |         |                                                       |         |         |
|----------------------------------------------------------------------|---------|---------|----------------------------|---------|---------|-------------------------------------------------------|---------|---------|
|                                                                      |         |         | Tryptophan                 | 5.5E-01 | 2.6E-02 |                                                       |         |         |
|                                                                      |         |         | Tyrosine                   | 4.5E-01 | 3.1E-02 |                                                       |         |         |
|                                                                      |         |         | Uracil                     | 4.2E+00 | 3.4E-05 |                                                       |         |         |
|                                                                      |         |         | Uric acid                  | 1.6E+00 | 3.6E-02 |                                                       |         |         |
|                                                                      |         |         | Urocanic acid              | 6.7E-01 | 3.2E-02 |                                                       |         |         |
| <b>Metabolites without statistical significant abundance changes</b> |         |         |                            |         |         |                                                       |         |         |
| 1-Methyl-L-histidine                                                 | 1.3E+00 | 4.9E-01 | HODE                       | 1.0E+00 | 6.6E-01 | (Aminooxy)acetic acid                                 | 7.8E-01 | 1.0E-01 |
| 2-Amino adipic acid                                                  | 2.1E+00 | 8.9E-02 | (R)-2-Hydroxybutyric acid  | 1.8E+00 | 1.9E-01 | 1,2-Pyrrolidinedicarboxylic acid                      | 8.7E-01 | 8.5E-01 |
| 3,4-Dimethylbenzoic acid                                             | 9.3E-01 | 1.0E+00 | 2'-Deoxyinosine            | 8.6E-01 | 8.2E-01 | 1-Butanol                                             | 8.8E-01 | 2.4E-01 |
| 3-Hydroxypyridine                                                    | 1.1E+00 | 4.3E-01 | 2-Hydroxycaproic acid      | 1.1E+00 | 4.4E-01 | 1-Hexanol                                             | 1.1E+00 | 6.9E-01 |
| 4-Indolecarbaldehyde                                                 | 8.7E-01 | 4.7E-01 | 3-Hydroxybutyric acid      | 2.9E+00 | 1.4E-01 | 1-Propanol, 3-(benzyloxy)-2-(dibenzylamino)-3-phenyl- | 5.7E-01 | 2.0E-01 |
| 4-Methyl-5-thiazoleethanol                                           | 6.7E-01 | 2.7E-01 | 4-Methyl-2-oxovaleric acid | 1.4E+00 | 2.4E-01 | 2-Buten-1-ol                                          | 1.0E+00 | 8.1E-01 |
| 7-Methylguanidine                                                    | 1.6E+00 | 1.8E-01 | 4-Nitrophenol              | 8.4E-01 | 3.2E-01 | 2-Hydroxy-3-methylbutyric acid                        | 1.4E+00 | 3.5E-01 |
| Acetyl-L-carnitine                                                   | 6.7E-01 | 2.4E-01 | Adenine                    | 7.8E-01 | 2.3E-01 | alpha-Hydroxybutyric acid                             | 2.4E+00 | 5.4E-02 |
| Adenine                                                              | 1.4E+00 | 3.1E-01 | Adipic acid                | 5.9E-01 | 8.9E-02 | 2-Thiobarbituric acid                                 | 1.1E+00 | 9.0E-01 |
| Adenosine                                                            | 2.0E+00 | 7.1E-02 | Adonitol                   | 3.8E+00 | 2.7E-01 | 3-Hydroxybutyric acid                                 | 3.8E+00 | 1.1E-01 |
| Alanine                                                              | 1.1E+00 | 2.9E-01 | Adrenic acid               | 8.9E-01 | 4.6E-01 | 3-Methylbutanoic acid                                 | 1.3E+00 | 7.7E-01 |
| Alanyl-L-proline                                                     | 7.5E-01 | 6.9E-01 | Alanine                    | 7.5E-01 | 8.5E-02 | 4-Hydroxybenzeneacetic acid                           | 7.3E-01 | 4.3E-01 |
| Anserine                                                             | 1.5E+00 | 3.1E-01 | Alpha-Aminoisobutyric acid | 2.2E+00 | 6.6E-02 | 6-Methyl-2-(methylthio)-4-pyrimidinol                 | 8.9E-01 | 6.1E-01 |
| Arginine                                                             | 5.0E-01 | 1.3E-01 | Alpha-ketoglutaric acid    | 2.0E+00 | 6.3E-02 | 9-Hexadecenoic acid                                   | 1.7E+00 | 6.1E-01 |
| Aspartic acid                                                        | 1.0E+00 | 6.3E-01 | Arachidonic acid           | 5.8E-01 | 3.4E-01 | Acetoacetic acid                                      | 9.7E-01 | 9.5E-01 |

## Supporting Information

|                             |         |         |                             |         |         |                      |         |         |
|-----------------------------|---------|---------|-----------------------------|---------|---------|----------------------|---------|---------|
| Betaine                     | 8.8E-01 | 1.3E-01 | Arginine                    | 6.8E-01 | 4.2E-01 | Alanine              | 1.2E+00 | 4.6E-01 |
| Cannabigerolic acid         | 6.4E-01 | 1.6E-01 | Aspartic acid               | 9.5E-01 | 6.4E-01 | Aspartic acid        | 9.6E-01 | 8.7E-01 |
| Carnitine                   | 9.4E-01 | 8.0E-01 | Azelaic acid                | 6.4E-01 | 1.6E-01 | Benzeneacetic acid   | 8.5E-01 | 4.1E-01 |
| Carnosine                   | 4.3E-01 | 5.4E-02 | Benzoic acid                | 1.4E+00 | 2.4E-01 | Benzoic Acid         | 8.3E-01 | 2.3E-01 |
| Choline                     | 1.2E+00 | 7.8E-01 | Cystine                     | 2.5E+00 | 3.7E-01 | Butyric Acid         | 5.8E-01 | 7.0E-01 |
| Coenzyme Q1                 | 9.1E-01 | 5.8E-01 | Deoxycholic acid            | 5.0E-01 | 3.0E-01 | Decanoic acid        | 2.8E+00 | 7.4E-02 |
| Creatine                    | 8.4E-01 | 6.3E-01 | Dihomo-gamma-Linolenic acid | 2.5E+00 | 1.3E-01 | Ethanolamine         | 6.3E-01 | 9.5E-02 |
| Creatinine                  | 7.9E-01 | 1.9E-01 | Docosahexaenoic acid        | 7.5E-01 | 7.0E-01 | Ethyl-diethanolamine | 9.5E-01 | 7.1E-01 |
| Cystine                     | 1.4E+00 | 6.4E-01 | Ethyl-β-D-glucuronide       | 3.5E+00 | 6.6E-01 | Ethylene glycol      | 9.4E-01 | 7.3E-01 |
| Ethanolamine                | 7.9E-01 | 5.6E-01 | Fructose                    | 1.4E+00 | 3.4E-01 | Fumaric acid         | 1.1E+00 | 7.4E-01 |
| Gamma-Aminobutyric acid     | 1.3E+00 | 3.4E-01 | Fumaric acid                | 1.8E+00 | 8.9E-02 | Glutamic acid        | 1.2E+00 | 5.0E-01 |
| Glutamic acid               | 1.9E+00 | 6.2E-02 | Glutamic acid               | 2.2E+00 | 5.5E-02 | Glyceraldehyde       | 1.3E+00 | 3.2E-01 |
| Glutamine                   | 6.1E-01 | 4.1E-01 | Glutamine                   | 6.9E-01 | 3.3E-01 | Glyceric acid        | 1.6E+00 | 2.7E-01 |
| Guanine                     | 3.6E-01 | 1.4E-01 | Glyceraldehyde 3-phosphate  | 9.0E-01 | 8.0E-01 | Glycerol             | 1.0E+00 | 7.4E-01 |
| Histidine                   | 5.8E-01 | 1.6E-01 | Glycine                     | 7.5E-01 | 4.3E-01 | Glycine              | 9.9E-01 | 7.5E-01 |
| Hypoxanthine                | 1.3E+00 | 1.8E-01 | Glycyl-L-leucine            | 7.3E-01 | 4.1E-01 | Glycolic acid        | 9.2E-01 | 8.2E-01 |
| Isoleucine                  | 7.0E-01 | 1.2E-01 | Histidine                   | 6.6E-01 | 1.9E-01 | Heptadecanoic acid   | 1.3E+00 | 4.1E-01 |
| Leucine                     | 7.2E-01 | 3.2E-01 | Hypoxanthine                | 1.2E+00 | 3.5E-01 | Hydracrylic acid     | 6.3E-01 | 3.9E-01 |
| Leucylproline               | 6.5E-01 | 2.3E-01 | Inosine                     | 1.2E+00 | 4.0E-01 | Hydroxylamine        | 1.1E+00 | 4.3E-01 |
| L-Pyroglutamic acid         | 1.2E+00 | 5.3E-01 | Isocitric acid              | 1.0E+00 | 6.6E-01 | Isobutyric acid      | 8.2E-01 | 4.4E-01 |
| Lysine                      | 8.3E-01 | 4.9E-01 | Itaconic acid               | 1.9E+00 | 6.0E-02 | Isoleucine           | 9.0E-01 | 3.6E-01 |
| Methionine                  | 8.5E-01 | 4.9E-01 | Lactic acid                 | 1.2E+00 | 3.7E-01 | Lactic acid          | 8.3E-01 | 6.4E-01 |
| Methionine sulfoxide        | 1.1E+00 | 5.5E-01 | Leukotriene B4              | 1.2E+00 | 9.8E-01 | Leucine              | 8.5E-01 | 3.0E-01 |
| Methylimidazoleacetic acid  | 7.2E-01 | 2.7E-01 | Levulinic acid              | 9.9E-01 | 9.7E-01 | Linoelaidic acid     | 1.7E+00 | 2.3E-01 |
| N6,N6,N6-Trimethyl-L-lysine | 1.2E+00 | 6.6E-01 | Lipoxin A4                  | 4.9E-01 | 1.5E-01 | L-Pyroglutamic acid  | 1.0E+00 | 8.6E-01 |
| N6-Acetyl-L-lysine          | 1.2E+00 | 3.7E-01 | L-Pyroglutamic acid         | 8.8E-01 | 4.4E-01 | Lysine               | 8.5E-01 | 8.3E-01 |
| N-Acetyl-D-Glucosamine      | 1.2E+00 | 1.0E-01 | Maleic acid                 | 8.7E-01 | 1.9E-01 | Methionine           | 6.2E-01 | 1.3E-01 |
| Nicotinamide                | 1.9E+00 | 2.9E-01 | Malonic acid                | 1.3E+00 | 3.7E-01 | Methylthiouracil     | 3.5E+00 | 9.9E-02 |

## Supporting Information

|                           |         |         |                        |         |         |                         |         |         |
|---------------------------|---------|---------|------------------------|---------|---------|-------------------------|---------|---------|
| Ornithine                 | 1.5E+00 | 2.7E-01 | Methionine             | 7.1E-01 | 4.8E-01 | Myristic acid           | 1.6E+00 | 1.0E-01 |
| Phenylalanine             | 7.2E-01 | 7.5E-02 | Methyl Salicylate      | 4.5E-01 | 2.8E-01 | N-Acetylaspartic acid   | 8.2E-01 | 4.5E-01 |
| Pipecolic acid            | 1.5E+00 | 2.5E-01 | Methylmalonic acid     | 1.1E+00 | 4.2E-01 | Nonanoic acid           | 7.9E-01 | 3.7E-01 |
| Proline                   | 1.3E+00 | 2.1E-01 | N-Acetyl-D-Glucosamine | 1.3E+00 | 1.1E-01 | Oxalic acid             | 8.8E-01 | 4.6E-01 |
| Sarcosine                 | 1.1E+00 | 8.1E-01 | N-Acetylmethionine     | 1.3E+00 | 2.8E-01 | Palmitic acid           | 3.0E+00 | 7.5E-02 |
| Serine                    | 9.9E-01 | 9.2E-01 | Oleic acid             | 1.2E+00 | 6.3E-01 | Pentadecanoic acid      | 2.7E+00 | 7.4E-02 |
| Tetrahydrocannabinol      | 6.8E-01 | 4.3E-01 | Oxalic acid            | 6.0E-01 | 5.7E-02 | Perfluoropropionic acid | 8.5E-01 | 5.8E-01 |
| Threonine                 | 1.0E+00 | 7.4E-01 | Palmitic acid          | 1.4E+00 | 2.2E-01 | Phenylalanine           | 7.8E-01 | 3.1E-01 |
| Tiglic acid               | 2.4E-01 | 1.9E-01 | Pantothenic acid       | 9.0E-01 | 3.9E-01 | Proline                 | 1.0E+00 | 8.2E-01 |
| Trans-4-Hydroxy-L-proline | 1.1E+00 | 6.9E-01 | Phenylalanine          | 7.3E-01 | 1.4E-01 | Propionic acid          | 1.2E+00 | 4.2E-01 |
| Tryptophan                | 4.3E-01 | 8.4E-02 | Propionic acid         | 1.8E+00 | 1.4E-01 | Serine                  | 8.6E-01 | 3.8E-01 |
| Urocanic acid             | 7.6E-01 | 8.4E-02 | Pyruvic acid           | 1.6E+00 | 5.0E-01 | Stearic acid            | 1.4E+00 | 2.3E-01 |
| Valine                    | 8.3E-01 | 2.1E-01 | Ribose                 | 9.4E-01 | 8.7E-01 | Succinic acid           | 1.4E+00 | 6.8E-01 |
| Valylproline              | 2.0E+00 | 8.6E-02 | Salicylic acid         | 6.6E-01 | 1.5E-01 | Taurine                 | 7.1E+00 | 1.3E-01 |
| Xanthurenic acid          | 4.7E-01 | 1.1E-01 | Serine                 | 8.1E-01 | 5.8E-01 | Threonine               | 9.6E-01 | 5.9E-01 |
|                           |         |         | Taurine                | 1.6E+00 | 7.7E-02 | Tyrosine                | 7.6E-01 | 3.5E-01 |
|                           |         |         | Thiamine               | 3.6E-01 | 8.6E-02 | Uracil                  | 1.2E+00 | 5.0E-01 |
|                           |         |         | Threonine              | 8.7E-01 | 4.4E-01 | Valine                  | 8.7E-01 | 3.0E-01 |
|                           |         |         | Trans-Ferulic acid     | 1.8E+00 | 6.6E-01 |                         |         |         |
|                           |         |         | Uridine                | 6.6E-01 | 2.3E-01 |                         |         |         |
|                           |         |         | Xanthine               | 1.0E+00 | 6.8E-01 |                         |         |         |
|                           |         |         | $\beta$ -Leucine       | 3.8E-01 | 6.0E-02 |                         |         |         |
